# Supplementary material
Source: Research Square preprint supplement (doi:10.21203/rs.3.rs-8987373/v1)

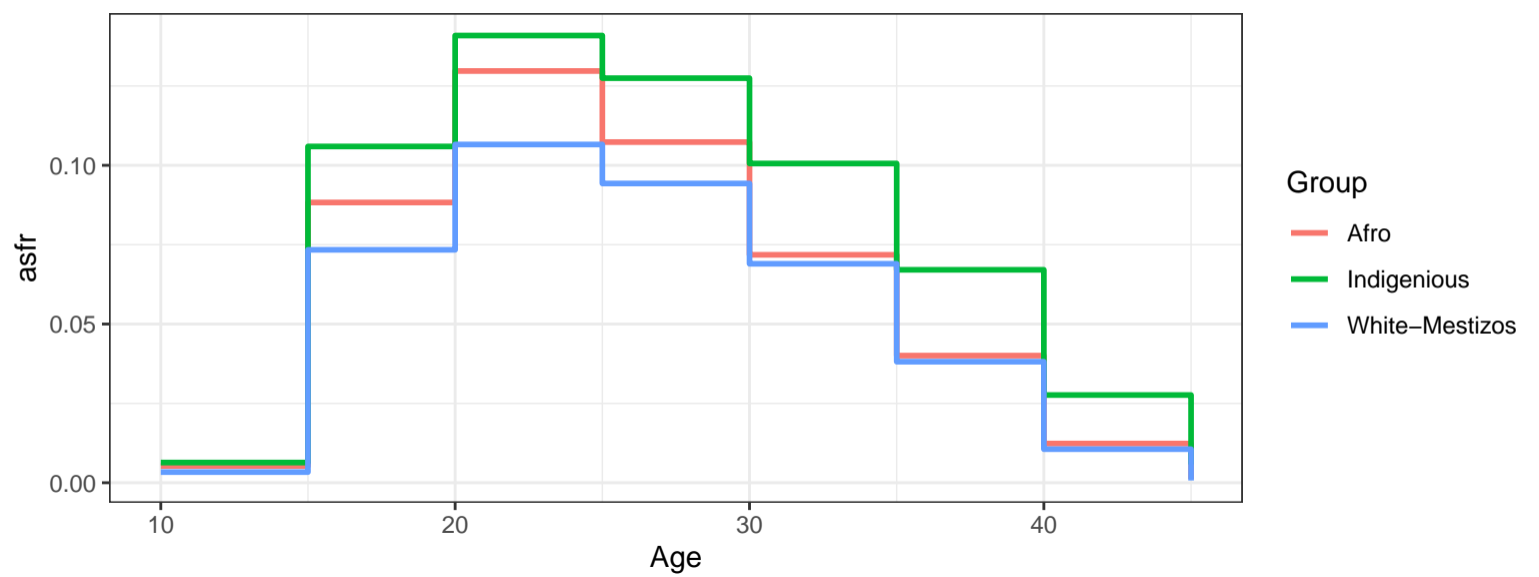

Supplement: Supplementary file 1 [file 44034ffeab25681c0b2cdc67.pdf]

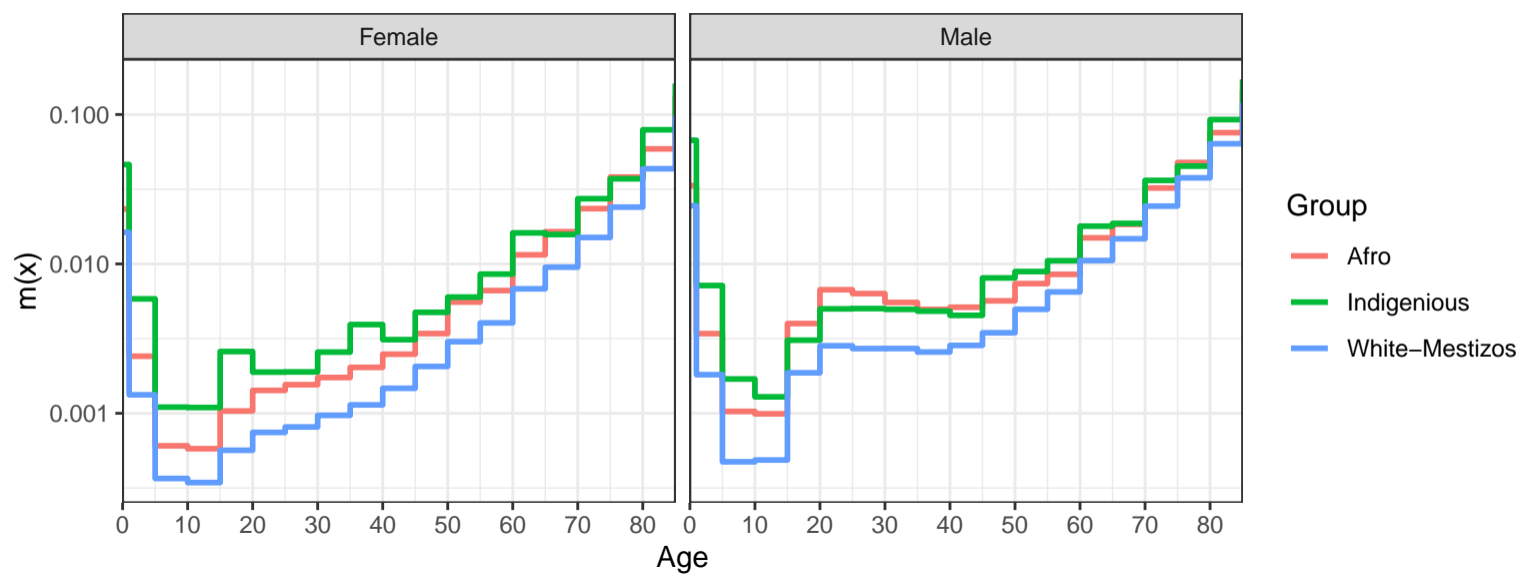

Supplement: Supplementary file 2 [file 71bbf10e2b9123eab12ea8de.pdf]
